# Supplementary material for: Transition states of spin-forbidden reactions
Source: Royal Society of Chemistry journal article supplement (doi:10.1039/c7cp07227a), 2018-01-01
Supplement: c7cp07227a1.pdf [file c7cp07227a1.pdf]

ELECTRONIC SUPPLEMENTARY INFORMATION

DEC. 28, 2017

**Transition States of Spin-Forbidden Reactions**

Bo Yang, Laura Gagliardi and Donald. G. Truhlar

Department of Chemistry, University of Minnesota, Minneapolis, Minnesota 55455-0431, USA.  
E-mail: yang3227@umn.edu, truhlar@umn.edu

Chemical Theory Center and Minnesota Supercomputing Institute, University of Minnesota,  
Minneapolis, Minnesota 55455-0431, USA

Inorganometallic Catalyst Design Center, University of Minnesota, Minneapolis, Minnesota  
55455-0431, USA.

**CONTENTS:**

1. Coupling constants  $\chi$

2. Optimized structures on the lowest mixed-spin PES for the CO association reaction of the Fe(CO)<sub>4</sub> Complex

3. Optimized structures on the lowest mixed-spin PES for the  $\alpha$ -H elimination reaction of the model W Complex

Energies are in hartrees. DFT calculations performed with the unrestricted Kohn-Sham theory using the of M06-L exchange-correlation functional. In section 2, the def2-TZVPP basis set is used for C, O, and Fe atoms. In section 3, the 6-31G\* basis set is used for C, H, O atoms, and the def2-TZVP basis set is used for the W atoms. Enthalpy ( $H$ ) and Gibbs free energy ( $G$ ) were computed at 298.15 Kelvin and 1 atmosphere pressure.

## 1. Coupling constants $\chi$

The coupling constant  $\chi$  was determined for each system by the following procedure:

- Initial saddle point geometry optimization is performed by employing the *TSSMM* Perl script along with the *Gaussian* program as described in the main text. An initial guess for the coupling constant  $\chi$  is provided, which was determined based on parametrization to an atom or monoatomic ion;
- A reaction coordinate scan was performed along the minimum energy path is using the optimized saddle point geometry from step (a) to locate a representative geometry along the reaction coordinate where the low- and high-spin surfaces are close in energy;
- Singlet-triplet excitation energies are computed at the representative geometry using the *ADF2016.103* program package. The spin-orbit coupling is included by employing the spin-orbit ZORA Hamiltonian. The M06-L exchange-correlation functional is used with a Slater-type ZORA/QZ4P basis set.
- The singlet–triplet splitting of the representative geometry is determined by averaging the corresponding singlet–triplet excitation energies as calculated in step (c). The value of coupling constant  $\chi$  is adjusted so that the difference between the eigenvalues of the following  $2 \times 2$  matrix reproduces the singlet-triplet splitting.

$$\begin{pmatrix} E_1 & \chi \\ \chi & E_2 \end{pmatrix}$$

where  $E_1$  and  $E_2$  are the energies of low- and high-spin states computed from the single-point calculations using *Gaussian* for the representative geometry.

- Steps (a) to (d) are repeated until the value of the coupling constant  $\chi$  converges to the desired precision.

Table S1: Calculated single-point energies, singlet–triplet excitation energies, and the coupling constant  $\chi$  for the  $\text{Fe}(\text{CO})_n$  and model W representative geometries at the final iteration. All energies are given in hartrees. The corresponding representative geometries are provided below Figs. S1 and S2.

|                          | W model complex | $\text{Fe}(\text{CO})_n$ |
|--------------------------|-----------------|--------------------------|
| $E_1$                    | -377.17345      | -1830.55724              |
| $E_2$                    | -377.17352      | -1830.55782              |
|                          | 0.58562         | 0.46338                  |
| $E_{\text{excitation}}$  | 0.59541         | 0.46343                  |
|                          | 0.63180         | 0.46387                  |
| Coupling constant $\chi$ | 0.011103        | 0.008513                 |

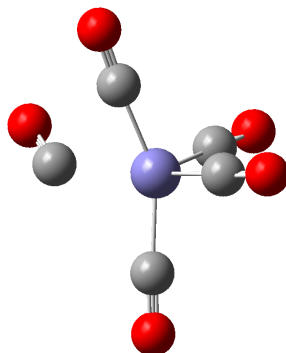

Fig. S1: The representative geometry of the  $\text{Fe}(\text{CO})_4 + \text{CO}$  system.

|    |                 |                 |                 |
|----|-----------------|-----------------|-----------------|
| Fe | 0.178049000000  | 0.009280000000  | -0.195510000000 |
| C  | -2.144052000000 | 0.815201000000  | -0.494665000000 |
| C  | 0.802900000000  | 1.720906000000  | -0.633644000000 |
| C  | 1.854855000000  | -0.738539000000 | -0.148327000000 |
| C  | -0.086581000000 | 0.136956000000  | 1.607737000000  |
| C  | -0.649950000000 | -1.606451000000 | -0.598403000000 |
| O  | -3.204639000000 | 0.589052000000  | -0.161325000000 |
| O  | 1.204884000000  | 2.769030000000  | -0.846106000000 |
| O  | 2.897081000000  | -1.207209000000 | -0.065615000000 |
| O  | -0.218539000000 | 0.196606000000  | 2.743749000000  |
| O  | -1.134408000000 | -2.625993000000 | -0.786450000000 |

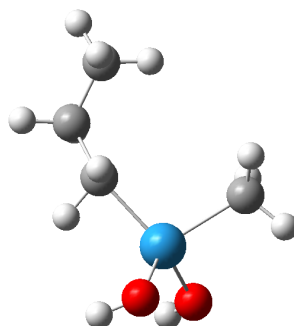

Fig. S2: The representative geometry of the model W system.

|   |                 |                 |                 |
|---|-----------------|-----------------|-----------------|
| C | 2.915106000000  | -0.460781000000 | 0.678123000000  |
| H | 2.820323000000  | 0.008037000000  | 1.667776000000  |
| H | 3.393703000000  | -1.437088000000 | 0.855271000000  |
| C | 1.546643000000  | -0.685420000000 | 0.087061000000  |
| H | 1.640453000000  | -1.098729000000 | -0.946800000000 |
| W | -0.374630000000 | -0.020996000000 | -0.009772000000 |
| H | 1.076289000000  | -1.514110000000 | 0.695179000000  |
| C | 3.816112000000  | 0.368450000000  | -0.213198000000 |
| H | 3.415218000000  | 1.379260000000  | -0.358326000000 |
| H | 4.821108000000  | 0.462101000000  | 0.213296000000  |
| H | 3.918386000000  | -0.088947000000 | -1.205617000000 |
| O | -1.281740000000 | -1.463951000000 | -0.893137000000 |
| H | -1.247778000000 | -2.330947000000 | -0.449669000000 |
| O | -1.668286000000 | 0.695078000000  | 1.231325000000  |
| H | -1.653141000000 | 0.452794000000  | 2.166417000000  |
| C | -0.109694000000 | 1.900851000000  | -0.837373000000 |
| H | 0.273115000000  | 2.527215000000  | -0.010182000000 |
| H | 0.573449000000  | 1.997851000000  | -1.689247000000 |
| H | -1.090655000000 | 2.305011000000  | -1.123577000000 |

## 2. Optimized structures on the lowest mixed-spin PES for the CO association reaction of the Fe(CO)<sub>4</sub> Complex

O atoms are shown in red; C in grey; Fe in purple.

### Fe(CO)<sub>4</sub> + CO (reactant)

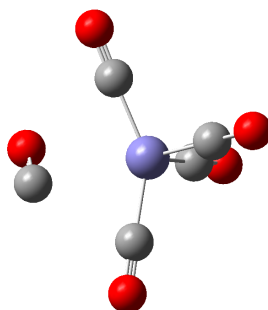

Fig. S3: Fe(CO)<sub>4</sub> + CO complex (reactant).

|    | SCF          | E <sub>ZP</sub> | H            | G            |
|----|--------------|-----------------|--------------|--------------|
|    | -1830.565360 | -1830.528169    | -1830.512874 | -1830.575159 |
| Fe | 0.35482600   | -0.00961700     | -0.22614000  |              |
| C  | -2.80001800  | 0.79962600      | -0.45695300  |              |
| C  | 0.54818300   | 1.80229800      | -0.64214200  |              |
| C  | 2.11602300   | -0.50733700     | -0.08845600  |              |
| C  | -0.01026500  | 0.07321000      | 1.56871400   |              |
| C  | -0.40619400  | -1.65115900     | -0.66321600  |              |
| O  | -3.54622000  | 0.10266800      | 0.02416400   |              |
| O  | 0.68128800   | 2.91169100      | -0.87461300  |              |
| O  | 3.21270900   | -0.81884200     | 0.01192300   |              |
| O  | -0.22961700  | 0.12095600      | 2.69131000   |              |
| O  | -0.85714200  | -2.67269500     | -0.90628800  |              |

**Fe(CO)<sub>4</sub> + CO (transition structure)**

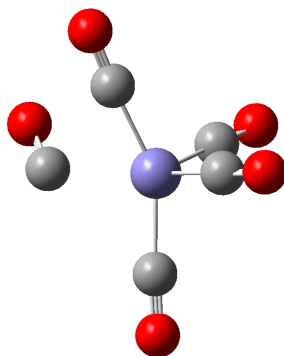

Fig. S4: Fe(CO)<sub>4</sub> + CO complex (transition structure).

| <b>SCF</b>   | <b>E<sub>ZP</sub></b> | <b>H</b>     | <b>G</b>     |
|--------------|-----------------------|--------------|--------------|
| -1830.564540 | -1830.527409          | -1830.513150 | -1830.570728 |

|    |             |             |             |
|----|-------------|-------------|-------------|
| Fe | 0.22263800  | -0.00566200 | -0.20503200 |
| C  | -2.27341700 | 0.91969500  | -0.55807600 |
| C  | 0.79742800  | 1.73086500  | -0.62779100 |
| C  | 1.90083700  | -0.75682600 | -0.12781600 |
| C  | -0.06714800 | 0.13003000  | 1.60010700  |
| C  | -0.66247400 | -1.60038800 | -0.59393400 |
| O  | -3.26184800 | 0.56528200  | -0.13521800 |
| O  | 1.19508700  | 2.77745200  | -0.84906300 |
| O  | 2.94286200  | -1.22538000 | -0.06156500 |
| O  | -0.22363600 | 0.20055100  | 2.73224600  |
| O  | -1.14745700 | -2.61703500 | -0.78941200 |

**Fe(CO)<sub>5</sub> (product)**

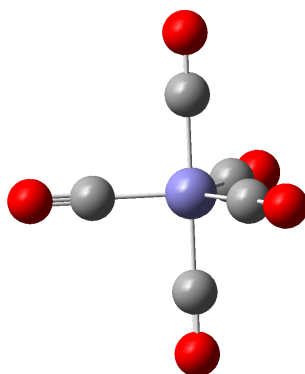

Fig. S5: Fe(CO)<sub>5</sub> complex (product).

| SCF          | E <sub>ZP</sub> | H            | G            |
|--------------|-----------------|--------------|--------------|
| -1830.616960 | -1830.574884    | -1830.562145 | -1830.615675 |
| Fe           | 0.00000600      | 0.00033600   | -0.00029500  |
| C            | 1.81586600      | 0.00060800   | -0.00045400  |
| C            | -0.00002200     | -1.21961500  | -1.34021000  |
| C            | -1.81585400     | 0.00075400   | -0.00050300  |
| C            | -0.00003800     | -0.55301600  | 1.72513200   |
| C            | 0.00007900      | 1.77147100   | -0.38416500  |
| O            | 2.95693200      | 0.00065900   | -0.00039100  |
| O            | -0.00006800     | -1.99023800  | -2.18660200  |
| O            | -2.95691900     | 0.00082500   | -0.00045500  |
| O            | -0.00010000     | -0.90264900  | 2.81509700   |
| O            | 0.00011200      | 2.89016000   | -0.62653900  |

### 3. Optimized structures on the lowest mixed-spin PES for the $\alpha$ -H elimination reaction of the model W Complex

O atoms are shown in red; H in light gray, C in dark Grey; W in Blue.

**W(CH<sub>3</sub>)(C<sub>3</sub>H<sub>7</sub>)(OH)<sub>2</sub> (reactant)**

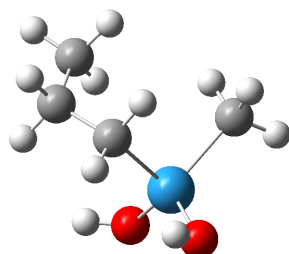

Fig. S6: W(CH<sub>3</sub>)(C<sub>3</sub>H<sub>7</sub>)(OH)<sub>2</sub> complex (reactant).

| SCF         | E <sub>ZP</sub> | H           | G           |
|-------------|-----------------|-------------|-------------|
| -377.214384 | -377.060080     | -377.046863 | -377.099766 |

|   |             |             |             |
|---|-------------|-------------|-------------|
| C | -2.50599000 | 0.80875000  | 0.27831700  |
| H | -2.42978000 | 0.87169600  | 1.37614800  |
| H | -3.29329400 | 1.52978300  | 0.00369300  |
| C | -1.17932200 | 1.22962500  | -0.35262900 |
| H | -1.30089800 | 1.27432600  | -1.45149600 |
| W | 0.49596700  | -0.04848100 | 0.05050100  |
| H | -0.94880200 | 2.26591700  | -0.04284700 |
| C | -2.96148400 | -0.58790000 | -0.11445500 |
| H | -2.28153800 | -1.36238600 | 0.26893400  |
| H | -3.96244500 | -0.81403100 | 0.27115200  |
| H | -2.98974600 | -0.70153100 | -1.20640700 |
| O | 1.64397700  | 1.44403300  | -0.35823300 |
| H | 1.22595200  | 2.31740600  | -0.43846900 |
| O | 0.49410200  | -0.94895200 | 1.73966100  |
| H | -0.19914300 | -0.83307900 | 2.40480100  |
| C | 0.26970600  | -1.43014300 | -1.54486300 |
| H | -0.59187900 | -2.09433400 | -1.38019500 |
| H | 0.07131900  | -0.88842400 | -2.48170400 |
| H | 1.15657400  | -2.06035000 | -1.71035900 |



**W( $\cdots$ H)(CH<sub>3</sub>)(=C<sub>3</sub>H<sub>6</sub>)(OH)<sub>2</sub> (transition structure)**

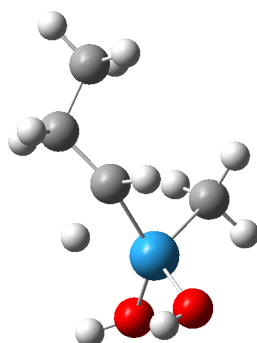

Fig. S7: W( $\cdots$ H)(CH<sub>3</sub>)(=C<sub>3</sub>H<sub>6</sub>)(OH)<sub>2</sub> complex (transition structure).

| SCF         | E <sub>ZP</sub> | H           | G           |
|-------------|-----------------|-------------|-------------|
| -377.169256 | -377.018825     | -377.006386 | -377.056746 |
| C           | 2.75476500      | -0.49692100 | 0.66265200  |
| H           | 2.66846800      | -0.03811600 | 1.65776400  |
| H           | 3.19563100      | -1.49505600 | 0.81976100  |
| C           | 1.39220000      | -0.59199800 | 0.03929900  |
| H           | 1.40125200      | -1.14322200 | -0.93707500 |
| W           | -0.48542700     | -0.04574900 | -0.00978200 |
| H           | 0.62772500      | -0.92650400 | 1.07995600  |
| C           | 3.68608400      | 0.33536600  | -0.20966500 |
| H           | 3.29355400      | 1.35035000  | -0.34119700 |
| H           | 4.68482600      | 0.40829800  | 0.23538400  |
| H           | 3.79640600      | -0.10658300 | -1.20747300 |
| O           | -1.41339700     | -1.47110300 | -0.89277200 |
| H           | -1.32731100     | -2.36616000 | -0.52320400 |
| O           | -1.79388100     | 0.67727500  | 1.22320500  |
| H           | -1.75031500     | 0.44148600  | 2.15765700  |
| C           | -0.22357400     | 1.89123400  | -0.83239900 |
| H           | 0.11804400      | 2.54791300  | -0.01489800 |
| H           | 0.44852800      | 2.01363400  | -1.68618700 |
| H           | -1.23385200     | 2.22393900  | -1.11944000 |

**W(H)(CH<sub>3</sub>)(=C<sub>3</sub>H<sub>6</sub>)(OH)<sub>2</sub> (product)**

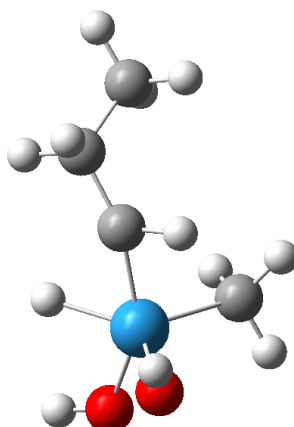

Fig. S8: W(H)(CH<sub>3</sub>)(=C<sub>3</sub>H<sub>6</sub>)(OH)<sub>2</sub> complex (product).

| SCF         | E <sub>ZP</sub> | H           | G           |
|-------------|-----------------|-------------|-------------|
| -377.209233 | -377.056625     | -377.044223 | -377.094628 |

|   |             |             |             |
|---|-------------|-------------|-------------|
| W | -0.42387000 | -0.03021600 | 0.04243900  |
| O | -0.54695900 | -1.59597800 | -1.06031400 |
| H | -1.38476400 | -2.05907900 | -0.89227700 |
| O | -2.07683400 | -0.36779800 | 1.01946300  |
| H | -2.09920000 | -0.45365300 | 1.97932500  |
| C | -1.19429700 | 1.74966400  | -0.81144000 |
| H | -1.16507500 | 2.46066600  | 0.03099700  |
| H | -0.64596000 | 2.20075800  | -1.64296300 |
| H | -2.24817300 | 1.61217900  | -1.08859500 |
| H | 0.10061200  | 0.01381000  | 1.68243000  |
| C | 1.39659000  | 0.37442700  | -0.02642700 |
| H | 1.22850000  | 0.24599300  | -1.14781000 |
| C | 2.78803600  | 0.62890000  | 0.40356700  |
| H | 2.79144700  | 0.71717400  | 1.49877400  |
| H | 3.12713400  | 1.60782200  | 0.02677600  |
| C | 3.77244700  | -0.45270200 | -0.03426000 |
| H | 4.78897300  | -0.22737400 | 0.30879300  |
| H | 3.48486900  | -1.42988500 | 0.36906600  |
| H | 3.80168700  | -0.54392400 | -1.12680400 |
